# Supplementary material
Source: Springer Nature journal article supplement (https://www.springermedizin.de/resource/supplementary/12888_2012_1296_MOESM2_ESM.pdf/9479800)

Comparison: CCBT versus control

Outcome: Reduction in depression symptoms post treatment

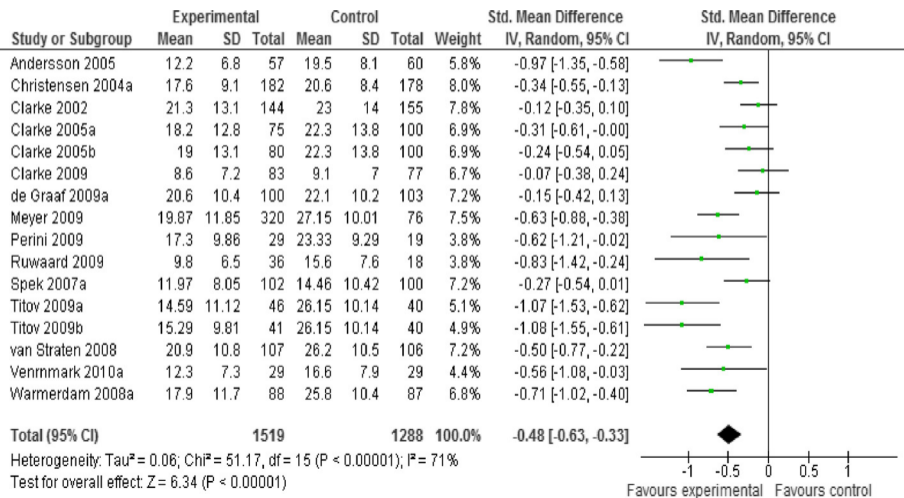

Supplement: MOESM2 [file 9479800]
